# Supplementary material for: Weighted Gene Co-expression Network Analysis for RNA-Sequencing Data of the Varicose Veins Transcriptome
Source: Front Physiol. 2019 Mar 19;10:278. doi: 10.3389/fphys.2019.00278 (PMC6433941; doi:10.3389/fphys.2019.00278)
Supplement: DATA SHEET S1 — Differentially expressed genes of VV and GSV from CAGB patients. [file Data_Sheet_1.CSV]

	geneid	baseMean	log2FoldChange	lfcSE	stat	pvalue	padj	SYMBOL	ENTREZID	reg
1	ENSG00000004846	40.8454014	-1.721707539	0.306745872	-5.612814048	1.99E-08	3.37E-06	ABCB5	340273	Down
2	ENSG00000005844	80.76749504	-1.012204735	0.266792651	-3.793975328	0.000148254	0.004005627	ITGAL	3683	Down
3	ENSG00000007908	253.8157863	-1.736009854	0.295526826	-5.874288563	4.25E-09	9.42E-07	SELE	6401	Down
4	ENSG00000010030	15.85573404	-1.196729693	0.304495233	-3.930208307	8.49E-05	0.002669801	ETV7	51513	Down
5	ENSG00000011422	218.1635379	-1.310111107	0.247442742	-5.294603092	1.19E-07	1.48E-05	PLAUR	5329	Down
6	ENSG00000011426	130.4074975	1.023369085	0.255174334	4.010470292	6.06E-05	0.002107864	ANLN	54443	UP
7	ENSG00000018280	42.9423366	-1.09925663	0.286977031	-3.830469036	0.000127899	0.003629526	SLC11A1	6556	Down
8	ENSG00000026751	30.72483483	-1.105006431	0.287010825	-3.850051411	0.000118093	0.003418617	SLAMF7	57823	Down
9	ENSG00000034971	1203.502177	-1.405043913	0.308953339	-4.547754423	5.42E-06	0.000325833	MYOC	4653	Down
10	ENSG00000038945	554.0376152	-1.261231346	0.211575868	-5.96113044	2.50E-09	6.24E-07	MSR1	4481	Down
11	ENSG00000041353	30.53758149	-1.21502695	0.305149585	-3.981742108	6.84E-05	0.002292722	RAB27B	5874	Down
12	ENSG00000042062	46.14189377	-1.301239283	0.286306375	-4.544918996	5.50E-06	0.000327988	FAM65C	140876	Down
13	ENSG00000042980	178.6748081	-1.035675569	0.216267384	-4.788866218	1.68E-06	0.000131322	ADAM28	10863	Down
14	ENSG00000043462	216.0745813	-1.016048243	0.222181421	-4.573056737	4.81E-06	0.000298095	LCP2	3937	Down
15	ENSG00000047457	361.3784503	-1.196982098	0.255126922	-4.691712214	2.71E-06	0.000191152	CP	1356	Down
16	ENSG00000057657	93.63400393	-1.06022183	0.275342855	-3.850551455	0.000117852	0.003418617	PRDM1	639	Down
17	ENSG00000059804	1503.631892	-1.736986838	0.293753168	-5.913082911	3.36E-09	8.02E-07	SLC2A3	6515	Down
18	ENSG00000071991	443.6560557	-1.022218616	0.232492165	-4.396787371	1.10E-05	0.000569826	CDH19	28513	Down
19	ENSG00000072858	30.87907226	-1.291191512	0.254006407	-5.083302932	3.71E-07	3.94E-05	SIDT1	54847	Down
20	ENSG00000073756	565.4624915	-2.611954892	0.286392815	-9.12018304	7.50E-20	3.27E-16	PTGS2	5743	Down
21	ENSG00000081041	208.987458	-2.103358989	0.309764371	-6.790190183	1.12E-11	5.00E-09	CXCL2	2920	Down
22	ENSG00000081237	623.4757793	-1.078161438	0.235475822	-4.578650276	4.68E-06	0.000293922	PTPRC	5788	Down
23	ENSG00000081320	512.404024	-1.189052556	0.188258645	-6.316058204	2.68E-10	9.35E-08	STK17B	9262	Down
24	ENSG00000082074	213.3434629	-1.235494955	0.238171834	-5.187409998	2.13E-07	2.41E-05	FYB	2533	Down
25	ENSG00000083814	94.66843103	1.030042371	0.222335115	4.632837116	3.61E-06	0.000242692	ZNF671	79891	UP
26	ENSG00000086205	22.00786497	-1.131774898	0.304924734	-3.71165331	0.00020591	0.005089917	FOLH1	2346	Down
27	ENSG00000086205	22.00786497	-1.131774898	0.304924734	-3.71165331	0.00020591	0.005089917	FOLH1B	219595	Down
28	ENSG00000087074	2893.340358	-1.67107982	0.227846719	-7.334228149	2.23E-13	1.49E-10	PPP1R15A	23645	Down
29	ENSG00000088827	286.0135414	-1.347020599	0.248548416	-5.419550135	5.97E-08	8.61E-06	SIGLEC1	6614	Down
30	ENSG00000090104	703.575575	-2.687557134	0.310087664	-8.667088206	4.43E-18	1.10E-14	RGS1	5996	Down
31	ENSG00000090382	231.0909491	-1.062649629	0.30175806	-3.521528568	0.000429066	0.008674409	LYZ	4069	Down
32	ENSG00000093072	248.4773739	-1.218385927	0.249872734	-4.876025921	1.08E-06	9.20E-05	CECR1	51816	Down
33	ENSG00000094963	933.8185832	-1.246411981	0.217873606	-5.720803016	1.06E-08	1.92E-06	FMO2	2327	Down
34	ENSG00000096060	1366.212625	-1.069748125	0.278074062	-3.846989966	0.000119578	0.003450138	FKBP5	2289	Down
35	ENSG00000099860	2237.513251	-1.977040886	0.278124939	-7.108463181	1.17E-12	6.60E-10	GADD45B	4616	Down
36	ENSG00000099985	16.95449561	-2.032346021	0.303910859	-6.687309654	2.27E-11	9.90E-09	OSM	5008	Down
37	ENSG00000100448	71.10676835	-1.128692854	0.297227886	-3.797398921	0.000146222	0.003973936	CTSG	1511	Down
38	ENSG00000100884	488.0092653	1.181476964	0.291288303	4.05603985	4.99E-05	0.001811729	CPNE6	9362	UP
39	ENSG00000101187	115.5175	-1.055586411	0.28319259	-3.727450678	0.000193426	0.004871159	SLCO4A1	28231	Down
40	ENSG00000101280	58.2109892	-1.234141717	0.295109775	-4.181975048	2.89E-05	0.001199092	ANGPT4	51378	Down
41	ENSG00000101916	45.3112487	-1.031408258	0.30030648	-3.434518826	0.000593607	0.010775819	TLR8	51311	Down
42	ENSG00000102445	168.1234295	1.051357893	0.242306934	4.338950925	1.43E-05	0.000696775	KIAA0226L	80183	UP
43	ENSG00000103175	1224.261352	1.046392844	0.196947009	5.313067964	1.08E-07	1.37E-05	WFDC1	58189	UP
44	ENSG00000104804	9.71124751	-1.000961397	0.30837151	-3.245959381	0.001170555	0.017373799	TULP2	7288	Down
45	ENSG00000104974	23.94727819	-1.05283583	0.291543809	-3.611243997	0.000304732	0.006843506	LILRA1	11024	Down
46	ENSG00000105835	1834.055839	-1.235061484	0.215481647	-5.731631912	9.95E-09	1.86E-06	NAMPT	10135	Down
47	ENSG00000105855	262.154908	-1.020130459	0.200475294	-5.088559478	3.61E-07	3.86E-05	ITGB8	3696	Down
48	ENSG00000106066	336.0066527	-1.080832673	0.180301984	-5.994568953	2.04E-09	5.39E-07	CPVL	54504	Down
49	ENSG00000106211	6560.583408	1.136367462	0.204351539	5.560846112	2.68E-08	4.37E-06	HSPB1	3315	UP
50	ENSG00000108511	13.44992345	1.176935686	0.29757771	3.955053246	7.65E-05	0.002487822	HOXB6	3216	UP
51	ENSG00000108551	151.0474898	-1.310619983	0.30238874	-4.334222181	1.46E-05	0.000704187	RASD1	51655	Down
52	ENSG00000108691	1417.107244	-2.396249534	0.302222328	-7.928764067	2.21E-15	2.41E-12	CCL2	6347	Down
53	ENSG00000108700	136.7143677	-2.138769428	0.307046761	-6.965614685	3.27E-12	1.68E-09	CCL8	6355	Down
54	ENSG00000109906	536.1032254	-1.120603633	0.238676322	-4.695076676	2.67E-06	0.000189568	ZBTB16	7704	Down
55	ENSG00000110324	340.9533558	-1.117442715	0.212804605	-5.251026933	1.51E-07	1.82E-05	IL10RA	3587	Down
56	ENSG00000110848	171.4864969	-2.995161197	0.307165725	-9.75096161	1.83E-22	1.59E-18	CD69	969	Down
57	ENSG00000111331	1037.094181	-1.130727478	0.309060688	-3.658593672	0.000253603	0.005988537	OAS3	4940	Down
58	ENSG00000112149	235.0638884	-2.218049899	0.297573793	-7.453781047	9.07E-14	6.59E-11	CD83	9308	Down
59	ENSG00000112303	37.83613527	-1.081022914	0.310323399	-3.483536587	0.000494835	0.009528727	VNN2	8875	Down
60	ENSG00000113070	223.8058843	-1.221644352	0.260342938	-4.692442832	2.70E-06	0.000191152	HBEGF	1839	Down
61	ENSG00000113494	56.24865384	-1.190614443	0.284078536	-4.19114538	2.78E-05	0.00116292	PRLR	5618	Down
62	ENSG00000114270	243.4081567	1.044740866	0.215218317	4.854330619	1.21E-06	0.000101206	COL7A1	1294	UP
63	ENSG00000115165	55.84551772	-1.175839392	0.294579871	-3.991580922	6.56E-05	0.002229712	CYTIP	9595	Down
64	ENSG00000115415	2571.09365	-1.005381944	0.25471304	-3.947116108	7.91E-05	0.002533905	STAT1	6772	Down
65	ENSG00000115525	148.9462557	-1.019606935	0.220203342	-4.630297288	3.65E-06	0.000244086	ST3GAL5	8869	Down
66	ENSG00000115602	31.70655221	-1.866037798	0.307045238	-6.077403484	1.22E-09	3.73E-07	IL1RL1	9173	Down
67	ENSG00000115665	63.02421828	-1.138415812	0.30353696	-3.75050146	0.000176481	0.004569895	SLC5A7	60482	Down
68	ENSG00000115956	200.8294907	-1.070810992	0.223621938	-4.788488119	1.68E-06	0.000131322	PLEK	5341	Down
69	ENSG00000116741	806.7490152	-1.941953652	0.229993773	-8.443505341	3.08E-17	5.96E-14	RGS2	5997	Down
70	ENSG00000117594	123.3951922	-1.004583013	0.262358416	-3.829048175	0.00012864	0.003634048	HSD11B1	3290	Down
71	ENSG00000118503	545.5599923	-1.41379378	0.240709457	-5.873445087	4.27E-09	9.42E-07	TNFAIP3	7128	Down
72	ENSG00000118515	1002.837508	-2.230090292	0.274610224	-8.120929582	4.63E-16	6.20E-13	SGK1	6446	Down
73	ENSG00000119917	1052.448333	-1.549381982	0.28524634	-5.431733086	5.58E-08	8.10E-06	IFIT3	3437	Down
74	ENSG00000119922	669.2105987	-1.103341301	0.280886247	-3.92807164	8.56E-05	0.002679118	IFIT2	3433	Down
75	ENSG00000120129	4421.994494	-1.877012873	0.221740674	-8.464901088	2.56E-17	5.58E-14	DUSP1	1843	Down
76	ENSG00000120217	62.67685643	-1.196740098	0.222448518	-5.379851966	7.45E-08	1.01E-05	CD274	29126	Down
77	ENSG00000120280	25.67202278	-1.399295405	0.288347059	-4.852816641	1.22E-06	0.000101293	CXorf21	80231	Down
78	ENSG00000120738	8829.078791	-2.344568953	0.307921025	-7.614189233	2.65E-14	2.10E-11	EGR1	1958	Down
79	ENSG00000121966	228.5397318	-1.76524873	0.245155332	-7.200531646	6.00E-13	3.60E-10	CXCR4	7852	Down
80	ENSG00000122877	286.6640159	-1.775588422	0.307050999	-5.782715009	7.35E-09	1.43E-06	EGR2	1959	Down
81	ENSG00000123358	3596.141808	-2.154180293	0.307729392	-7.000242263	2.56E-12	1.35E-09	NR4A1	3164	Down
82	ENSG00000123500	156.6448349	1.148944112	0.279682479	4.108030343	3.99E-05	0.001558108	COL10A1	1300	UP
83	ENSG00000124731	35.8348477	-1.622280052	0.310376182	-5.226818756	1.72E-07	2.03E-05	TREM1	54210	Down
84	ENSG00000124762	2189.190316	-1.665776454	0.282593926	-5.894593986	3.76E-09	8.61E-07	CDKN1A	1026	Down
85	ENSG00000125347	625.8467502	-1.191339973	0.265003968	-4.495555222	6.94E-06	0.000399088	IRF1	3659	Down
86	ENSG00000125538	21.125961	-1.431270113	0.308069156	-4.645937719	3.39E-06	0.000229856	IL1B	3553	Down
87	ENSG00000125657	14.20921421	-1.169615564	0.300740567	-3.889118041	0.000100609	0.003007363	TNFSF9	8744	Down
88	ENSG00000125740	8286.925724	-2.687922641	0.308053265	-8.725512577	2.65E-18	7.70E-15	FOSB	2354	Down
89	ENSG00000126262	10.55121632	-1.248404548	0.288416253	-4.328481958	1.50E-05	0.00071685	FFAR2	2867	Down
90	ENSG00000126368	460.7612838	-1.204610202	0.299979261	-4.015644947	5.93E-05	0.002074225	NR1D1	9572	Down
91	ENSG00000128016	8424.189782	-2.577752766	0.294894527	-8.741270299	2.31E-18	7.70E-15	ZFP36	7538	Down
92	ENSG00000128342	69.35149083	-1.068448469	0.288220254	-3.707055466	0.000209683	0.005175844	LIF	3976	Down
93	ENSG00000130066	2394.041048	-1.162238713	0.198979879	-5.840986129	5.19E-09	1.10E-06	SAT1	6303	Down
94	ENSG00000130513	28.57630304	-1.480547693	0.309263999	-4.787326356	1.69E-06	0.000131494	GDF15	9518	Down
95	ENSG00000130518	196.4486638	-1.055724303	0.217137311	-4.862012409	1.16E-06	9.78E-05	KIAA1683	80726	Down
96	ENSG00000130775	177.9105055	-1.332929102	0.235203441	-5.66713265	1.45E-08	2.53E-06	THEMIS2	9473	Down
97	ENSG00000131386	1649.723616	-1.33033586	0.2800047	-4.751119743	2.02E-06	0.000150016	GALNT15	117248	Down
98	ENSG00000132334	360.7715491	-1.061425662	0.191659579	-5.538077819	3.06E-08	4.76E-06	PTPRE	5791	Down
99	ENSG00000133106	312.2602943	-1.095072372	0.304740146	-3.593462775	0.000326312	0.00719118	EPSTI1	94240	Down
100	ENSG00000133454	139.3744193	1.143788468	0.27901898	4.099321368	4.14E-05	0.001597591	MYO18B	84700	UP
101	ENSG00000133805	87.13562796	-1.054648252	0.214822571	-4.90939218	9.14E-07	8.12E-05	AMPD3	272	Down
102	ENSG00000134321	418.131286	-1.364079563	0.305884958	-4.459452901	8.22E-06	0.000451723	RSAD2	91543	Down
103	ENSG00000134326	227.9782872	-1.363087613	0.301587632	-4.5197066	6.19E-06	0.000361139	CMPK2	129607	Down
104	ENSG00000136167	766.0622832	-1.25709943	0.219433024	-5.728852503	1.01E-08	1.87E-06	LCP1	3936	Down
105	ENSG00000136244	252.7017862	-1.650146972	0.289104546	-5.707786315	1.14E-08	2.04E-06	IL6	3569	Down
106	ENSG00000136634	18.62168163	-1.95455992	0.303336852	-6.443529384	1.17E-10	4.42E-08	IL10	3586	Down
107	ENSG00000136689	34.15952381	-1.277493173	0.289930045	-4.406211752	1.05E-05	0.000552174	IL1RN	3557	Down
108	ENSG00000136826	2011.076605	-2.127337536	0.269597414	-7.890793551	3.00E-15	3.08E-12	KLF4	9314	Down
109	ENSG00000136997	860.1125572	-1.650177116	0.285812965	-5.773625826	7.76E-09	1.49E-06	MYC	4609	Down
110	ENSG00000137265	49.99968389	-1.313477688	0.301053907	-4.362931878	1.28E-05	0.000633548	IRF4	3662	Down
111	ENSG00000137331	502.5153653	-1.048217326	0.239497391	-4.376737974	1.20E-05	0.00061075	IER3	8870	Down
112	ENSG00000137462	217.7054313	-1.090217396	0.217710025	-5.007658229	5.51E-07	5.42E-05	TLR2	7097	Down
113	ENSG00000138135	68.45860207	-1.984882876	0.310234102	-6.398016414	1.57E-10	5.84E-08	CH25H	9023	Down
114	ENSG00000138166	100.5383698	-1.649619655	0.274425157	-6.011182323	1.84E-09	5.02E-07	DUSP5	1847	Down
115	ENSG00000138669	41.4134766	-1.715644198	0.308787431	-5.556068749	2.76E-08	4.45E-06	PRKG2	5593	Down
116	ENSG00000138670	195.7613765	-1.39924514	0.253835529	-5.51240854	3.54E-08	5.36E-06	RASGEF1B	153020	Down
117	ENSG00000139289	265.9493889	-1.166554509	0.289877842	-4.024296932	5.71E-05	0.00202004	PHLDA1	22822	Down
118	ENSG00000140009	7.553114446	-1.009122487	0.307937594	-3.277035694	0.001049031	0.015907443	ESR2	2100	Down
119	ENSG00000140287	62.42258147	-1.317983424	0.287506799	-4.584181761	4.56E-06	0.00028949	HDC	3067	Down
120	ENSG00000141506	102.3914003	-1.22345437	0.218722552	-5.593636144	2.22E-08	3.69E-06	PIK3R5	23533	Down
121	ENSG00000141576	19.34173576	-1.042719523	0.302669172	-3.445080038	0.00057089	0.010505708	RNF157	114804	Down
122	ENSG00000141682	30.88618414	-1.551688088	0.309779671	-5.009005541	5.47E-07	5.42E-05	PMAIP1	5366	Down
123	ENSG00000141854	29.94162074	1.107411381	0.270404933	4.095381576	4.21E-05	0.001610865	LOC113230	113230	UP
124	ENSG00000142871	4863.73827	-1.198858679	0.26944148	-4.449421375	8.61E-06	0.000471124	CYR61	3491	Down
125	ENSG00000143333	464.5736425	-2.098404705	0.305990385	-6.857747206	7.00E-12	3.39E-09	RGS16	6004	Down
126	ENSG00000143384	6658.481581	-1.314718402	0.193097569	-6.808570448	9.86E-12	4.52E-09	MCL1	4170	Down
127	ENSG00000143632	2350.190641	1.548866418	0.309471376	5.004877792	5.59E-07	5.47E-05	ACTA1	58	UP
128	ENSG00000143942	22.40543403	1.060921078	0.265940203	3.989321903	6.63E-05	0.002240724	CHAC2	494143	UP
129	ENSG00000144655	944.5302586	-1.606238729	0.299538801	-5.36237283	8.21E-08	1.11E-05	CSRNP1	64651	Down
130	ENSG00000144802	1759.523939	-2.29945844	0.288080691	-7.981994324	1.44E-15	1.67E-12	NFKBIZ	64332	Down
131	ENSG00000144891	276.8925446	-1.344248097	0.222889498	-6.031006893	1.63E-09	4.73E-07	AGTR1	185	Down
132	ENSG00000146278	1669.263147	-1.016198082	0.173611121	-5.853300616	4.82E-09	1.05E-06	PNRC1	10957	Down
133	ENSG00000147234	21.97509935	-1.216855346	0.302605617	-4.021258288	5.79E-05	0.002038012	FRMPD3	84443	Down
134	ENSG00000148339	456.6609178	-1.390480828	0.274105027	-5.072803093	3.92E-07	4.09E-05	SLC25A25	114789	Down
135	ENSG00000148926	349.8127337	-1.254662786	0.23630275	-5.309556431	1.10E-07	1.39E-05	ADM	133	Down
136	ENSG00000149243	13.6279015	1.148606407	0.303159842	3.788781517	0.000151388	0.004077648	KLHL35	283212	UP
137	ENSG00000149418	29.90663111	-1.042042723	0.305839988	-3.407150028	0.00065645	0.011588364	ST14	6768	Down
138	ENSG00000149534	80.16572211	-1.484994511	0.240412902	-6.17685032	6.54E-10	2.04E-07	MS4A2	2206	Down
139	ENSG00000150394	77.88137824	1.008100707	0.310227059	3.249557632	0.001155847	0.017186807	CDH8	1006	UP
140	ENSG00000152580	330.8136322	-1.000036946	0.257164495	-3.888705346	0.00010078	0.003007363	IGSF10	285313	Down
141	ENSG00000153234	1047.59668	-2.95348155	0.299601752	-9.858024959	6.33E-23	1.10E-18	NR4A2	4929	Down
142	ENSG00000153898	19.06014379	-1.405062935	0.298816	-4.702100744	2.57E-06	0.000183911	MCOLN2	255231	Down
143	ENSG00000154258	923.0868866	-1.120338947	0.202099125	-5.543512121	2.96E-08	4.68E-06	ABCA9	10350	Down
144	ENSG00000154262	1034.643906	-1.151013166	0.1404967	-8.192456968	2.56E-16	4.05E-13	ABCA6	23460	Down
145	ENSG00000154451	94.1517714	-1.422561637	0.268874771	-5.290796268	1.22E-07	1.51E-05	GBP5	115362	Down
146	ENSG00000154734	5229.389972	-1.872651956	0.25818161	-7.25323525	4.07E-13	2.63E-10	ADAMTS1	9510	Down
147	ENSG00000155307	59.16935893	-1.154706271	0.287366927	-4.018229526	5.86E-05	0.002056073	SAMSN1	64092	Down
148	ENSG00000156463	85.16092054	1.073493097	0.241284298	4.449079795	8.62E-06	0.000471124	SH3RF2	153769	UP
149	ENSG00000156920	26.27916022	-1.837236351	0.310352532	-5.919836833	3.22E-09	7.91E-07	ADGRG4	139378	Down
150	ENSG00000157404	281.5856846	-1.241031305	0.232108919	-5.346762669	8.95E-08	1.16E-05	KIT	3815	Down
151	ENSG00000158022	5.656853939	-1.153681713	0.294411708	-3.918599983	8.91E-05	NA	TRIM63	84676	Down
152	ENSG00000158050	42.19069192	-1.585002076	0.308927794	-5.130655476	2.89E-07	3.16E-05	DUSP2	1844	Down
153	ENSG00000158258	1203.606736	-1.142885197	0.227921189	-5.014387668	5.32E-07	5.30E-05	CLSTN2	64084	Down
154	ENSG00000158859	299.8893591	-1.465307534	0.310153556	-4.724458271	2.31E-06	0.000167539	ADAMTS4	9507	Down
155	ENSG00000159251	3301.231309	1.551920659	0.29244992	5.306620227	1.12E-07	1.40E-05	ACTC1	70	UP
156	ENSG00000159388	4082.801896	-2.232331335	0.287494193	-7.764787556	8.18E-15	7.13E-12	BTG2	7832	Down
157	ENSG00000160593	211.7970325	-1.11510342	0.261980991	-4.256428743	2.08E-05	0.000921095	AMICA1	120425	Down
158	ENSG00000160888	470.9787544	-1.49749065	0.28934979	-5.175364563	2.27E-07	2.56E-05	IER2	9592	Down
159	ENSG00000161405	36.85240557	-1.315675293	0.267934434	-4.910437513	9.09E-07	8.12E-05	IKZF3	22806	Down
160	ENSG00000161960	83.42229174	-1.210069905	0.264767351	-4.570313911	4.87E-06	0.000299889	EIF4A1	1973	Down
161	ENSG00000162706	179.7233326	-1.02545156	0.262035228	-3.913411059	9.10E-05	0.002806871	CADM3	57863	Down
162	ENSG00000162711	86.49740221	-1.252556264	0.279103691	-4.487781076	7.20E-06	0.000408391	NLRP3	114548	Down
163	ENSG00000162739	17.8171585	-1.037024446	0.306360793	-3.384977675	0.00071184	0.012221915	SLAMF6	114836	Down
164	ENSG00000162772	2353.987039	-2.116383845	0.310379014	-6.818707934	9.19E-12	4.33E-09	ATF3	467	Down
165	ENSG00000162894	11.12769009	-1.078604494	0.30841096	-3.497296252	0.00047	0.009223742	FCMR	9214	Down
166	ENSG00000163564	17.82917949	-1.327985445	0.293497085	-4.524697225	6.05E-06	0.000357295	PYHIN1	149628	Down
167	ENSG00000163599	9.06879533	-1.001519461	0.309058307	-3.240551825	0.001192986	0.017601134	CTLA4	1493	Down
168	ENSG00000163660	3919.132641	-1.42001754	0.190646957	-7.448414391	9.45E-14	6.59E-11	CCNL1	57018	Down
169	ENSG00000163734	32.04723984	-2.557219756	0.309765611	-8.255337796	1.51E-16	2.64E-13	CXCL3	2921	Down
170	ENSG00000163751	235.4699154	-1.171203456	0.292350121	-4.006167169	6.17E-05	0.002138081	CPA3	1359	Down
171	ENSG00000163823	98.37848191	-1.060645905	0.247801461	-4.280224588	1.87E-05	0.000845118	CCR1	1230	Down
172	ENSG00000163884	153.3662906	-1.022847388	0.235436496	-4.344472531	1.40E-05	0.000681511	KLF15	28999	Down
173	ENSG00000164056	1025.990285	-1.139936648	0.19544237	-5.832597345	5.46E-09	1.13E-06	SPRY1	10252	Down
174	ENSG00000164120	118.2344573	-1.661679629	0.22982092	-7.230323637	4.82E-13	3.00E-10	HPGD	3248	Down
175	ENSG00000164188	156.413572	-1.059016708	0.260033943	-4.0726095	4.65E-05	0.001723289	RANBP3L	202151	Down
176	ENSG00000164691	100.4003352	-1.495129995	0.256475766	-5.829517621	5.56E-09	1.14E-06	TAGAP	117289	Down
177	ENSG00000164707	85.34803678	1.127785976	0.236756519	4.763484356	1.90E-06	0.000143549	SLC13A4	26266	UP
178	ENSG00000164855	52.29679616	1.045077584	0.281190205	3.716621576	0.000201905	0.005005106	TMEM184A	202915	UP
179	ENSG00000165030	382.5103733	-1.045512722	0.241943817	-4.321303746	1.55E-05	0.000733288	NFIL3	4783	Down
180	ENSG00000165197	60.23963442	-1.394613932	0.287415202	-4.852262237	1.22E-06	0.000101293	FIGF	2277	Down
181	ENSG00000165997	719.4930002	-1.276344175	0.22809173	-5.595749458	2.20E-08	3.68E-06	ARL5B	221079	Down
182	ENSG00000166407	21.54283021	1.036656504	0.310341621	3.340372136	0.000836662	0.013652161	LMO1	4004	UP
183	ENSG00000167912	18.06776038	-1.014384379	0.300810388	-3.372172034	0.000745778	0.0126304	LOC100505501	100505501	Down
184	ENSG00000168040	29.82529339	1.078753514	0.288166798	3.743503832	0.000181472	0.004671358	FADD	8772	UP
185	ENSG00000168421	14.49699281	-1.129685622	0.309727347	-3.647355107	0.000264954	0.006172924	RHOH	399	Down
186	ENSG00000168502	493.4768649	1.210430942	0.21659655	5.588412847	2.29E-08	3.77E-06	MTCL1	23255	UP
187	ENSG00000169245	82.22269868	-1.089631591	0.308618158	-3.530678811	0.000414495	0.008478169	CXCL10	3627	Down
188	ENSG00000169252	73.50514647	-1.239706068	0.23832463	-5.201753885	1.97E-07	2.27E-05	ADRB2	154	Down
189	ENSG00000169271	275.2024454	1.013619606	0.224804562	4.508892507	6.52E-06	0.000377297	HSPB3	8988	UP
190	ENSG00000169429	111.2595053	-2.039563479	0.29599499	-6.890533785	5.56E-12	2.77E-09	CXCL8	3576	Down
191	ENSG00000169508	276.0423138	-2.029742856	0.258235573	-7.860043583	3.84E-15	3.72E-12	GPR183	1880	Down
192	ENSG00000170345	21077.08801	-2.378472501	0.309641248	-7.681381322	1.57E-14	1.31E-11	FOS	2353	Down
193	ENSG00000171033	81.6810203	-1.148492985	0.250261523	-4.589171242	4.45E-06	0.000284072	PKIA	5569	Down
194	ENSG00000171051	79.76596672	-1.278631669	0.308719701	-4.141723592	3.45E-05	0.001384144	FPR1	2357	Down
195	ENSG00000171174	14.22221918	-1.024274847	0.305519214	-3.352570969	0.000800647	0.013313814	RBKS	64080	Down
196	ENSG00000171223	3116.778686	-2.286360165	0.306808293	-7.452080714	9.19E-14	6.59E-11	JUNB	3726	Down
197	ENSG00000171476	689.6338082	1.005906921	0.208706735	4.819714702	1.44E-06	0.000115989	HOPX	84525	UP
198	ENSG00000172236	271.2268829	-1.176103554	0.239062525	-4.919648346	8.67E-07	7.87E-05	TPSAB1	7177	Down
199	ENSG00000172243	282.4079986	-1.108974916	0.251904249	-4.402366846	1.07E-05	0.000558688	CLEC7A	64581	Down
200	ENSG00000172602	38.74998101	-2.408236236	0.31009674	-7.766080471	8.10E-15	7.13E-12	RND1	27289	Down
201	ENSG00000173334	325.4525923	-1.009557158	0.235651913	-4.28410338	1.83E-05	0.000837032	TRIB1	10221	Down
202	ENSG00000173530	257.7130936	-1.139976836	0.205339176	-5.551677274	2.83E-08	4.52E-06	TNFRSF10D	8793	Down
203	ENSG00000174125	132.8555559	-1.00129042	0.283922631	-3.526631242	0.000420883	0.008578912	TLR1	7096	Down
204	ENSG00000176125	15.03557165	1.247573434	0.293654351	4.248441854	2.15E-05	0.000952127	UFSP1	402682	UP
205	ENSG00000176597	100.6622585	-1.444641038	0.286002562	-5.051147193	4.39E-07	4.48E-05	B3GNT5	84002	Down
206	ENSG00000177575	708.7790688	-1.130252771	0.227017361	-4.978706324	6.40E-07	6.10E-05	CD163	9332	Down
207	ENSG00000177606	8172.546387	-2.332552764	0.29143076	-8.003797413	1.21E-15	1.50E-12	JUN	3725	Down
208	ENSG00000178531	147.2384327	1.174076236	0.261789657	4.48480757	7.30E-06	0.000411592	CTXN1	404217	UP
209	ENSG00000178878	989.3366623	-1.530857178	0.304760214	-5.023152989	5.08E-07	5.09E-05	APOLD1	81575	Down
210	ENSG00000179094	2263.063358	-1.033269969	0.22629099	-4.566111837	4.97E-06	0.000304883	PER1	5187	Down
211	ENSG00000179136	161.8346096	1.099385237	0.239846672	4.583700195	4.57E-06	0.00028949	LINC00670	284034	UP
212	ENSG00000179388	286.2376289	-1.914191703	0.305516718	-6.265423755	3.72E-10	1.22E-07	EGR3	1960	Down
213	ENSG00000179403	1119.988614	1.060623664	0.179630493	5.904474502	3.54E-09	8.33E-07	VWA1	64856	UP
214	ENSG00000179909	149.3070654	1.127687253	0.237331947	4.751518989	2.02E-06	0.000150016	ZNF154	7710	UP
215	ENSG00000180914	245.460177	1.209464375	0.309986404	3.901669103	9.55E-05	0.002907446	OXTR	5021	UP
216	ENSG00000181085	17.12968041	1.015364196	0.3048091	3.331147912	0.000864886	0.014007783	MAPK15	225689	UP
217	ENSG00000182836	691.3888431	-1.123041294	0.224628047	-4.999559529	5.75E-07	5.58E-05	PLCXD3	345557	Down
218	ENSG00000182885	8.02034723	-1.231533702	0.287339422	-4.285989343	1.82E-05	0.00083433	ADGRG3	222487	Down
219	ENSG00000183287	66.61896654	-1.37221318	0.297935166	-4.605744264	4.11E-06	0.000268254	CCBE1	147372	Down
220	ENSG00000183486	704.9882301	-1.164529341	0.290952373	-4.002474111	6.27E-05	0.002158865	MX2	4600	Down
221	ENSG00000184374	9.35629231	1.163130519	0.304371207	3.821420993	0.000132685	0.003705609	COLEC10	10584	UP
222	ENSG00000184557	2563.836403	-2.538947807	0.310340997	-8.181155027	2.81E-16	4.08E-13	SOCS3	9021	Down
223	ENSG00000184979	101.6566485	-1.230280217	0.26444789	-4.652259529	3.28E-06	0.000225259	USP18	11274	Down
224	ENSG00000185507	186.3617178	-1.049318757	0.27041788	-3.880360117	0.000104302	0.003107127	IRF7	3665	Down
225	ENSG00000185666	7.994075737	-1.033221793	0.30923185	-3.341252827	0.000834012	0.01363446	SYN3	8224	Down
226	ENSG00000185761	171.1282237	1.028911772	0.159062516	6.468599876	9.89E-11	3.83E-08	ADAMTSL5	339366	UP
227	ENSG00000185811	131.6263788	-1.333833065	0.226128767	-5.898555417	3.67E-09	8.52E-07	IKZF1	10320	Down
228	ENSG00000185862	121.7402528	-1.06667909	0.238064052	-4.480639056	7.44E-06	0.00041435	EVI2B	2124	Down
229	ENSG00000185972	22.35713442	1.198081584	0.299149444	4.004960087	6.20E-05	0.002143662	CCIN	881	UP
230	ENSG00000186407	34.84501175	-1.146715118	0.31032793	-3.695172124	0.000219738	0.005378331	CD300E	342510	Down
231	ENSG00000187013	10.75124281	1.101113385	0.309302433	3.559989407	0.00037087	0.007768206	NA	NA	UP
232	ENSG00000187672	12.54285613	1.032412994	0.308741584	3.343938903	0.000825979	0.013569771	ERC2	26059	UP
233	ENSG00000188042	158.413483	-1.369559026	0.235114234	-5.825079163	5.71E-09	1.16E-06	ARL4C	10123	Down
234	ENSG00000188290	124.651613	1.225708609	0.253351259	4.837981131	1.31E-06	0.000107315	HES4	57801	UP
235	ENSG00000188404	92.91653795	-1.095595246	0.307217823	-3.566183879	0.000362217	0.007642083	SELL	6402	Down
236	ENSG00000189292	124.2998842	-1.005299235	0.306811376	-3.27660352	0.001050638	0.015907443	FAM150B	285016	Down
237	ENSG00000189409	36.07548468	1.131464454	0.289552619	3.907629841	9.32E-05	0.002849649	MMP23B	8510	UP
238	ENSG00000196616	3805.069721	-1.435328466	0.283203582	-5.068186133	4.02E-07	4.17E-05	ADH1B	125	Down
239	ENSG00000196684	11.64615093	-1.01471489	0.310344761	-3.269637569	0.001076854	0.016177869	HSH2D	84941	Down
240	ENSG00000196735	1285.056297	-1.052970226	0.259439717	-4.05863157	4.94E-05	0.001795859	HLA-DQA1	3117	Down
241	ENSG00000197019	279.5416044	-1.189389895	0.248931696	-4.777976912	1.77E-06	0.000135937	SERTAD1	29950	Down
242	ENSG00000197249	109.472912	-1.007770268	0.304821484	-3.30609987	0.000946044	0.014893137	SERPINA1	5265	Down
243	ENSG00000197253	261.0683033	-1.23227434	0.238696193	-5.162521975	2.44E-07	2.70E-05	TPSB2	64499	Down
244	ENSG00000197301	7.253595145	-1.522892035	0.309540849	-4.919841894	8.66E-07	7.87E-05	LOC100129940	100129940	Down
245	ENSG00000197405	221.5871125	-1.378110585	0.254723483	-5.410221969	6.29E-08	8.92E-06	C5AR1	728	Down
246	ENSG00000198576	20.46323226	-1.285413346	0.308720199	-4.163683977	3.13E-05	0.001275076	ARC	23237	Down
247	ENSG00000198842	58.23708702	1.217694117	0.309974992	3.928362442	8.55E-05	0.002679118	DUSP27	92235	UP
248	ENSG00000198846	104.8132394	-1.100297422	0.22893345	-4.806188978	1.54E-06	0.000122414	TOX	9760	Down
249	ENSG00000199047	9.98490824	1.661502568	0.31011578	5.357684687	8.43E-08	1.13E-05	NA	NA	UP
250	ENSG00000199133	23.67144604	1.08882897	0.296761468	3.669037547	0.000243465	0.005803966	MIRLET7D	406886	UP
251	ENSG00000203706	114.3546148	1.001607879	0.222941222	4.492699335	7.03E-06	0.000403149	SERTAD4-AS1	574036	UP
252	ENSG00000203710	45.10414197	-1.444549592	0.28706263	-5.032175711	4.85E-07	4.89E-05	CR1	1378	Down
253	ENSG00000203837	19.50158749	-1.767698067	0.30895782	-5.721486732	1.06E-08	1.92E-06	PNLIPRP3	119548	Down
254	ENSG00000205038	69.88357077	-1.185649276	0.308456225	-3.843816986	0.000121135	0.003483541	PKHD1L1	93035	Down
255	ENSG00000205362	40.94846623	-1.212629357	0.297266582	-4.079265655	4.52E-05	0.001696811	MT1A	4489	Down
256	ENSG00000211666	10.26362992	-1.435557265	0.300339708	-4.779778456	1.75E-06	0.00013532	NA	NA	Down
257	ENSG00000211679	9.219223514	-1.085390298	0.289765607	-3.745752677	0.000179854	0.004636554	NA	NA	Down
258	ENSG00000211890	32.39079426	-1.108675173	0.310298369	-3.572932641	0.000353006	0.007493804	NA	NA	Down
259	ENSG00000211893	65.30357543	-1.023648371	0.306334704	-3.34160106	0.000832967	0.01363446	NA	NA	Down
260	ENSG00000211896	255.427465	-1.213059917	0.31010882	-3.911723367	9.16E-05	0.002816592	NA	NA	Down
261	ENSG00000212694	199.3994987	1.212687036	0.192139187	6.31150289	2.76E-10	9.44E-08	LINC01089	338799	UP
262	ENSG00000221866	1138.035823	1.137024396	0.218309134	5.208322593	1.91E-07	2.23E-05	PLXNA4	91584	UP
263	ENSG00000221869	460.7214156	-1.452381163	0.286169148	-5.075254177	3.87E-07	4.06E-05	CEBPD	1052	Down
264	ENSG00000223382	13.21516858	1.225550909	0.284826357	4.302800212	1.69E-05	0.000783764	LOC105378622	105378622	UP
265	ENSG00000224796	11.33733602	-1.157541363	0.310279055	-3.73064615	0.000190989	0.004827474	NA	NA	Down
266	ENSG00000224934	44.29727051	1.011004984	0.255741184	3.953234934	7.71E-05	0.002497492	NA	NA	UP
267	ENSG00000225492	65.44207869	-1.022642763	0.256364247	-3.989022558	6.63E-05	0.002240724	GBP1P1	400759	Down
268	ENSG00000225886	20.54656851	-1.188344244	0.310081959	-3.832355319	0.000126922	0.003609257	NA	NA	Down
269	ENSG00000231024	3.883562014	-1.04069621	0.294441309	-3.53447759	0.000408582	NA	NA	NA	Down
270	ENSG00000232057	39.43174618	1.436371323	0.251377743	5.713995628	1.10E-08	1.98E-06	NA	NA	UP
271	ENSG00000232434	240.5759957	1.024867672	0.202632716	5.05776012	4.24E-07	4.35E-05	C9orf172	389813	UP
272	ENSG00000232810	28.73962036	-1.541014641	0.29959184	-5.143713663	2.69E-07	2.97E-05	TNF	7124	Down
273	ENSG00000236801	46.44500395	-1.443640354	0.264691664	-5.454045411	4.92E-08	7.27E-06	NA	NA	Down
274	ENSG00000239951	19.61291425	-1.16970988	0.31032266	-3.769334415	0.000163683	0.004315449	NA	NA	Down
275	ENSG00000242689	10.40175725	-1.105252178	0.309890928	-3.566584493	0.000361664	0.007639664	CNTF	1270	Down
276	ENSG00000243650	12.24053108	-1.066632126	0.297432191	-3.586135459	0.000335615	0.007272527	RN7SL834P	106481148	Down
277	ENSG00000244482	28.99878841	-1.107575822	0.301732199	-3.670724657	0.000241864	0.005773918	LILRB3	11025	Down
278	ENSG00000244482	28.99878841	-1.107575822	0.301732199	-3.670724657	0.000241864	0.005773918	LILRA6	79168	Down
279	ENSG00000244953	55.73755193	-1.244113364	0.230522631	-5.39692506	6.78E-08	9.45E-06	NA	NA	Down
280	ENSG00000245869	197.0328664	2.219011654	0.239983305	9.246525092	2.32E-20	1.35E-16	NA	NA	UP
281	ENSG00000246985	97.17252581	1.056137729	0.235273406	4.488980494	7.16E-06	0.000407569	SOCS2-AS1	144481	UP
282	ENSG00000247092	30.37904687	1.008331702	0.281942687	3.576371191	0.000348397	0.007440579	NA	NA	UP
283	ENSG00000247595	12.78769264	1.025925127	0.308888588	3.321343568	0.000895852	0.014358226	SPTY2D1-AS1	100506540	UP
284	ENSG00000248367	5.838254496	1.018750044	0.309612019	3.290408575	0.00100042	NA	NA	NA	UP
285	ENSG00000249346	93.90240204	1.450175694	0.295978487	4.899598314	9.60E-07	8.45E-05	LINC01016	100507584	UP
286	ENSG00000249992	264.7436336	1.065536329	0.260124271	4.096258782	4.20E-05	0.001610865	TMEM158	25907	UP
287	ENSG00000252061	7.649560269	-1.0384306	0.309505013	-3.355133374	0.000793267	0.013226489	RNU6-415P	106481309	Down
288	ENSG00000255142	14.48674708	1.187849588	0.309863395	3.833462121	0.000126352	0.003609257	NA	NA	UP
289	ENSG00000259645	6.4113083	1.223666622	0.310260027	3.944003469	8.01E-05	NA	NA	NA	UP
290	ENSG00000259775	10.85809639	1.066792352	0.300142062	3.554291402	0.000378999	0.007876831	NA	NA	UP
291	ENSG00000259884	125.5729099	-1.08529972	0.268012747	-4.049433218	5.13E-05	0.001842281	NA	NA	Down
292	ENSG00000260233	21.39856479	1.152737667	0.265806962	4.336747457	1.45E-05	0.000700016	NA	NA	UP
293	ENSG00000260305	3.385298039	1.027167353	0.291792642	3.520196208	0.000431228	NA	NTRK3-AS1	283738	UP
294	ENSG00000260942	43.89347297	1.380508385	0.250414369	5.512896046	3.53E-08	5.36E-06	CAPN10-AS1	101752400	UP
295	ENSG00000261136	18.57017226	1.291537172	0.288141082	4.482308329	7.38E-06	0.000413765	NA	NA	UP
296	ENSG00000261326	179.3656727	1.166134144	0.177882648	6.555637418	5.54E-11	2.25E-08	NA	NA	UP
297	ENSG00000261467	9.614062061	1.497527411	0.310186362	4.827831241	1.38E-06	0.00011188	NA	NA	UP
298	ENSG00000263934	3.071729241	-1.036752241	0.281792505	-3.679133485	0.000234028	NA	SNORD3A	780851	Down
299	ENSG00000263961	30.36615937	-1.271327142	0.296614353	-4.286128192	1.82E-05	0.00083433	C1orf186	440712	Down
300	ENSG00000267304	14.92948803	1.00307369	0.309225069	3.243830432	0.001179339	0.017446813	NA	NA	UP
301	ENSG00000267322	11.44925707	1.16426399	0.303976682	3.830109542	0.000128086	0.003629526	SCARNA17	677769	UP
302	ENSG00000267322	11.44925707	1.16426399	0.303976682	3.830109542	0.000128086	0.003629526	SNHG22	103091864	UP
303	ENSG00000267838	10.24222904	1.184525808	0.308825487	3.83558307	0.000125267	0.0035905	NA	NA	UP
304	ENSG00000267940	11.77481628	1.090090054	0.305850734	3.564124361	0.000365073	0.007683725	NA	NA	UP
305	ENSG00000268355	23.40022989	-1.609593603	0.298725873	-5.38819616	7.12E-08	9.84E-06	NA	NA	Down
306	ENSG00000269609	57.30720155	1.208680896	0.246058459	4.912169655	9.01E-07	8.09E-05	RPARP-AS1	100505761	UP
307	ENSG00000269894	10.02233671	1.01033894	0.308682962	3.273063514	0.001063886	0.016024491	NA	NA	UP
308	ENSG00000269952	8.115424291	-1.017623168	0.300125585	-3.390657835	0.000697251	0.012006909	NA	NA	Down
309	ENSG00000270562	18.83260164	1.456914053	0.286913099	5.077893118	3.82E-07	4.03E-05	NA	NA	UP
310	ENSG00000270681	18.36061396	-1.101051692	0.308208765	-3.572421738	0.000353695	0.007498596	NA	NA	Down
311	ENSG00000271327	35.20755911	1.159034843	0.275704128	4.203908197	2.62E-05	0.001129438	NA	NA	UP
312	ENSG00000271576	55.62053042	1.123185365	0.277184244	4.052125579	5.08E-05	0.001827473	NA	NA	UP
313	ENSG00000272375	12.24183029	1.005027884	0.310349956	3.238369664	0.001202149	0.017679204	NA	NA	UP
314	ENSG00000272455	32.45078655	1.010832185	0.271754914	3.719646391	0.000199502	0.004966742	NA	NA	UP
315	ENSG00000273008	14.95444744	1.098155842	0.304960468	3.600977697	0.000317023	0.007073951	NA	NA	UP
316	ENSG00000273079	6.355722879	-1.030797235	0.304871188	-3.381091016	0.000721986	NA	GRIN2B	2904	Down
317	ENSG00000273723	19.90622677	1.0589663	0.294409934	3.596910891	0.000322019	0.007157934	NA	NA	UP
318	ENSG00000273899	53.16307667	1.011437902	0.256174273	3.948241519	7.87E-05	0.002531331	NOL12	79159	UP
319	ENSG00000274460	26.05878073	1.171959544	0.297674078	3.937056096	8.25E-05	0.002614589	NA	NA	UP
320	ENSG00000275302	65.52204928	-1.880743504	0.310369314	-6.059695403	1.36E-09	4.03E-07	CCL4	6351	Down
321	ENSG00000275993	124.5923067	-1.067637479	0.308218757	-3.463895224	0.000532414	0.010030677	LOC102724428	102724428	Down
322	ENSG00000276070	61.50532168	-1.934147583	0.305694816	-6.327053919	2.50E-10	8.89E-08	CCL4L2	9560	Down
323	ENSG00000276070	61.50532168	-1.934147583	0.305694816	-6.327053919	2.50E-10	8.89E-08	CCL4L1	388372	Down
324	ENSG00000276085	86.82624515	-2.03832831	0.310314535	-6.56858794	5.08E-11	2.11E-08	CCL3L1	6349	Down
325	ENSG00000276085	86.82624515	-2.03832831	0.310314535	-6.56858794	5.08E-11	2.11E-08	CCL3L3	414062	Down
326	ENSG00000276409	71.81073847	1.494527235	0.248158649	6.022466854	1.72E-09	4.83E-07	CCL14	6358	UP
327	ENSG00000277007	20.0567065	1.015371164	0.302952466	3.351585734	0.000803502	0.013348543	NA	NA	UP
328	ENSG00000279312	134.7749729	1.000497723	0.195414421	5.119876606	3.06E-07	3.33E-05	NA	NA	UP
329	ENSG00000279520	21.00343935	-1.256170785	0.288097303	-4.360230976	1.30E-05	0.000639606	NA	NA	Down
330	ENSG00000279673	26.13747207	1.062803369	0.28969495	3.66869829	0.000243789	0.005803966	NA	NA	UP
331	ENSG00000280285	49.91913821	1.144367211	0.305859879	3.741475389	0.000182943	0.00468157	NA	NA	UP
332	ENSG00000280302	17.26327426	1.560644019	0.297651475	5.243192623	1.58E-07	1.88E-05	NA	NA	UP
333	ENSG00000283341	18.24428565	1.024573353	0.306978769	3.337603306	0.000845043	0.013763145	NA	NA	UP
